# Supplementary material for: Characterizing the mechanism of action for mRNA therapeutics for the treatment of propionic acidemia, methylmalonic acidemia, and phenylketonuria
Source: PubMed Central journal article supplement (PMC11076592; doi:10.1038/s41467-024-47460-9), 2024-05-07
Supplement: 41467_2024_47460_MOESM1_ESM.pdf [file 41467_2024_47460_MOESM1_ESM.pdf]

## **Supplementary Information**

### **Characterizing the Mechanism of Action for mRNA Therapeutics for the Treatment of Propionic Acidemia, Methylmalonic Acidemia, and Phenylketonuria**

**Baek et al**

**Supplementary Table 1.** Summary of plasma hPCCA mRNA and hPCCB mRNA PK parameters in male and female *Pcca*<sup>-/-</sup> (A138T) mice and male and females combined following a single IV bolus injection of mRNA-3927.

| Analyte                         | hPCCA         |                 |                    | hPCCB         |                 |                    |
|---------------------------------|---------------|-----------------|--------------------|---------------|-----------------|--------------------|
|                                 | Male<br>(n=9) | Female<br>(n=9) | Combined<br>(n=18) | Male<br>(n=9) | Female<br>(n=9) | Combined<br>(n=18) |
| Dose                            | 1.0 mg/kg     |                 |                    |               |                 |                    |
| AUC <sub>tlast</sub> (hr·ng/mL) | 8600          | 6290            | 7400               | 7180          | 4720            | 5880               |
| C <sub>max</sub> (ng/mL)        | 1080          | 1080            | 1080               | 1010          | 776             | 892                |
| T <sub>1/2</sub> (hr)           | 5.37          | 4.99            | 5.39               | 4.45          | 4.47            | 4.92               |
| CL (mL/hr/kg)                   | 116           | 159             | 135                | 139           | 212             | 170                |
| V <sub>z</sub> (mL/kg)          | 900           | 1140            | 1050               | 894           | 1370            | 1210               |
| Dose                            | 2.0 mg/kg     |                 |                    |               |                 |                    |
| AUC <sub>tlast</sub> (hr·ng/mL) | 29400         | 18800           | 24000              | 20700         | 9280            | 14900              |
| C <sub>max</sub> (ng/mL)        | 2530          | 1930            | 2180               | 1710          | 1080            | 1350               |
| T <sub>1/2</sub> (hr)           | 6.13          | 4.07            | 5.50               | 5.72          | 4.40            | 5.47               |
| CL (mL/hr/kg)                   | 67.6          | 107             | 83.0               | 96.5          | 215             | 134                |
| V <sub>z</sub> (mL/kg)          | 598           | 626             | 659                | 797           | 1370            | 1060               |

AUC<sub>tlast</sub>, area under the concentration versus time curve from the last start of dose administration

to the time after dosing; C<sub>max</sub>, maximum observed concentration; CL, clearance; hPCCA, human propionyl-CoA carboxylase  $\alpha$  subunit; hPCCB, human propionyl-CoA carboxylase  $\beta$  subunit;

IV, intravenous; mRNA, messenger RNA; PK, pharmacokinetic; T<sub>1/2</sub>, terminal half-life; V<sub>z</sub>,

volume of distribution based on the terminal elimination phase.

**Supplementary Table 2.** Summary of plasma disease biomarker AUC below baseline in mRNA-3927 or control treated *Pcca*<sup>-/-</sup> (A138T) mice.

|                          | <b>Control<br/>(Tris-sucrose)<br/>n=6</b> | <b>mRNA-3927<br/>(0.5 mg/kg)<br/>n=5~6</b> |
|--------------------------|-------------------------------------------|--------------------------------------------|
| AUC_below_B (mean ± SD)  |                                           |                                            |
| 2-MC (week·μM)           | 2.37 ± 2.32                               | 8.71 ± 3.49                                |
| 3-HP (week·μM)           | 37.7 ± 37.0                               | 170 ± 163                                  |
| C3/C2 ratio (week·ratio) | 0.124 ± 0.187                             | 1.23 ± 0.916                               |
| PCC Activity (mean ±SD)  | 2.72 ± 2.26                               | 7.77 ± 4.27                                |

2-MC; 2-methylcitrate; 3-HP, 3-hydroxypropionate; AUC\_below\_B; area under the curve that is below the baseline and above the response curve; C3/C2, ratio of propionylcarnitine to acetylcarnitine; mRNA, messenger ribonucleic acid; PCC, propionyl-CoA carboxylase; SD, standard deviation.

**Supplementary Table 3.** Summary of plasma hMUT mRNA PK parameters following a single IV bolus administration of mRNA-3705 in CD1 mice.

| <b>Sex</b>                      | <b>Male<br/>n=12</b> | <b>Female<br/>n=12</b> | <b>Combined<sup>a</sup><br/>n=24</b> |
|---------------------------------|----------------------|------------------------|--------------------------------------|
| Dose <sup>b</sup>               | 0.1 mg/kg            |                        |                                      |
| AUC <sub>tlast</sub> (hr·ng/mL) | 1340                 | 662                    | 1010                                 |
| C <sub>max</sub> (ng/mL)        | 517                  | 232                    | 375                                  |
| T <sub>1/2</sub> (hr)           | 4.05                 | 18.7 <sup>c</sup>      | 6.42                                 |
| CL (mL/hr/kg)                   | 74.3                 | 149 <sup>c</sup>       | 99.2                                 |
| V <sub>z</sub> (mL/kg)          | 434                  | 4020 <sup>c</sup>      | 919                                  |
| Dose                            | 0.5 mg/kg            |                        |                                      |
| AUC <sub>tlast</sub> (hr·ng/mL) | 13900                | 8290                   | 11100                                |
| C <sub>max</sub> (ng/mL)        | 3750                 | 1480                   | 2620                                 |
| T <sub>1/2</sub> (hr)           | 4.90                 | 4.43                   | 4.93                                 |
| CL (mL/hr/kg)                   | 35.9                 | 60.2                   | 45.0                                 |
| V <sub>z</sub> (mL/kg)          | 253                  | 385                    | 320                                  |
| Dose                            | 1.0 mg/kg            |                        |                                      |
| AUC <sub>tlast</sub> (hr·ng/mL) | 36600                | 26100                  | 31200                                |
| C <sub>max</sub> (ng/mL)        | 6140                 | 4740                   | 5150                                 |
| T <sub>1/2</sub> (hr)           | 8.57                 | 4.77                   | 7.33                                 |
| CL (mL/hr/kg)                   | 27.1                 | 38.2                   | 31.8                                 |
| V <sub>z</sub> (mL/kg)          | 335                  | 263                    | 337                                  |

AUC<sub>tlast</sub>, area under the concentration versus time curve from the last start of dose administration to the time after dosing; CL, clearance; C<sub>max</sub>, maximum observed concentration; hMUT, human methylmalonyl-CoA mutase; PK, pharmacokinetic; IV, intravenous; mRNA, messenger RNA; T<sub>1/2</sub>, terminal half-life; V<sub>z</sub>, volume of distribution based on the terminal elimination phase.

<sup>a</sup>Sex differences were observed, values presented for information purpose only.

<sup>b</sup>Dose level refers to the average total amount of mRNA in the administered LNPs.

<sup>c</sup>Values presented for information purpose only.

**Supplementary Table 4.** Descriptive statistics of liver hMUT protein concentrations, liver MUT enzyme activity, and tissue methylmalonic acid concentrations in mRNA-3705 or control treated

*Mut*<sup>-/-</sup>;Tg<sup>INS-CBA-G715V</sup> mice at the end of the single-dose study.

|                                                                             | <b>Control<br/>n=4</b> | <b>mRNA-3705<br/>(0.2 mg/kg)<br/>n=5</b> | <b>mRNA-3705<br/>(0.5 mg/kg)<br/>n=4<sup>a</sup></b> |
|-----------------------------------------------------------------------------|------------------------|------------------------------------------|------------------------------------------------------|
| Liver hMUT protein concentrations (ng/mg protein)                           |                        |                                          |                                                      |
| Mean ± SD                                                                   | 0.0 ± 0.0              | 45.0 ± 42.2                              | 70.4 ± 24.2                                          |
| <i>P</i> value                                                              | -                      | 0.0836                                   | 0.0136                                               |
| Liver MUT enzyme activity (nmol/min/mg protein)                             |                        |                                          |                                                      |
| Mean ± SD                                                                   | 2.8 ± 0.2              | 5.7 ± 2.8                                | 10.7 ± 6.5                                           |
| <i>P</i> -value                                                             | -                      | 0.4577                                   | 0.0317                                               |
| Plasma methylmalonic acid concentrations (μM)                               |                        |                                          |                                                      |
| Baseline (Day -7)                                                           | 892 ± 241              | 614 ± 190                                | 589 ± 206                                            |
| Day 1                                                                       | 1260 ± 280             | 425 ± 422                                | 114 ± 20                                             |
| <i>P</i> value                                                              | 0.0732                 | 0.4085                                   | 0.0201                                               |
| Tissue methylmalonic acid concentrations 24 hours post-dose (nmol/g tissue) |                        |                                          |                                                      |
| Liver                                                                       |                        |                                          |                                                      |
| Mean ± SD                                                                   | 4662.5 ± 1752.2        | 1091.9 ± 1457.5                          | 7.9 ± 15.8                                           |
| <i>P</i> value                                                              | -                      | 0.0046                                   | 0.0011                                               |
| Kidney                                                                      |                        |                                          |                                                      |
| Mean ± SD                                                                   | 3480.0 ± 1612.1        | 1094.0 ± 1245.6                          | 189.7 ± 128.9                                        |
| <i>P</i> value                                                              | -                      | 0.0240                                   | 0.0052                                               |
| Heart                                                                       |                        |                                          |                                                      |
| Mean ± SD                                                                   | 124.1 ± 37.1           | 43.6 ± 61.5                              | 8.1 ± 16.3                                           |
| <i>P</i> value                                                              | -                      | 0.0411                                   | 0.0080                                               |

hMUT, human methylmalonyl-CoA mutase; mRNA, messenger RNA; SD, standard deviation.

<sup>a</sup>One animal in the mRNA-3705 mg/kg group received only a partial dose; therefore, the sample was removed from the analysis. For plasma methylmalonic acid, a two-way repeated measure ANOVA followed by Šídák's multiple comparisons test was used. For tissue methylmalonic acid concentrations, liver MUT protein concentrations, and liver protein activity, one-way ANOVAs followed by Dunnett's pairwise comparison tests were performed. For all statistical tests, two-tailed *p*-values <0.05 were considered statistically significant.

**Supplementary Table 5.** Summary of serum mRNA from mRNA-3210 PK parameters in male or female PAH<sup>enu2</sup> mice following a single IV dose of mRNA-3210.

| <b>Sex</b>                      | <b>Male<br/>n=4</b> | <b>Female<br/>n=4</b> | <b>Combined<br/>n=8</b> |
|---------------------------------|---------------------|-----------------------|-------------------------|
| Dose                            | 0.25 mg/kg          |                       |                         |
| AUC <sub>0-168</sub> (hr·ng/mL) | 2450                | 1780                  | 2115                    |
| C <sub>max</sub> (ng/mL)        | 453                 | 434                   | 444                     |
| Eff T <sub>1/2</sub> (hr)       | 4.89                | 3.46                  | 4.18                    |
| CL (mL/hr/kg)                   | NA                  | 141                   | -                       |
| V <sub>z</sub> (mL/kg)          | NA                  | 3210                  | -                       |
| Dose                            | 0.5 mg/kg           |                       |                         |
| AUC <sub>0-168</sub> (hr·ng/mL) | 5880                | 4620                  | 5250                    |
| C <sub>max</sub> (ng/mL)        | 876                 | 959                   | 918                     |
| Eff T <sub>1/2</sub> (hr)       | 4.80                | 3.64                  | 4.22                    |
| CL (mL/hr/kg)                   | 85.1                | 108                   | 96.6                    |
| V <sub>z</sub> (mL/kg)          | 2360                | 2560                  | 2460                    |
| Dose                            | 1.0 mg/kg           |                       |                         |
| AUC <sub>0-168</sub> (hr·ng/mL) | 11,200              | 31,700                | 21,450                  |
| C <sub>max</sub> (ng/mL)        | 1640                | 1850                  | 1750                    |
| Eff T <sub>1/2</sub> (hr)       | 5.29                | 19.9                  | 12.6                    |
| CL (mL/hr/kg)                   | 89.5                | 31.6                  | 60.6                    |
| V <sub>z</sub> (mL/kg)          | 2480                | 395                   | 1438                    |

AUC<sub>0-168</sub>, area under the concentration-time curve from 0 to 168 hours; CL, clearance; C<sub>max</sub>, maximum observed concentration; PK, pharmacokinetic; IV, intravenous; mRNA, messenger RNA; Eff T<sub>1/2</sub>, Effective terminal half-life; V<sub>z</sub>, volume of distribution based on the terminal elimination phase.

**Supplementary Table 6.** Summary of liver mRNA from mRNA-3210 PK parameters in male and female mice combined following a single IV dose of mRNA-3210

| <b>PK parameter</b>                      | <b>mRNA-3210<br/>(0.25 mg/kg)<br/>n=8</b> | <b>mRNA-3210<br/>(0.5 mg/kg)<br/>n=8</b> | <b>mRNA-3210<br/>(1.0 mg/kg)<br/>n=8</b> |
|------------------------------------------|-------------------------------------------|------------------------------------------|------------------------------------------|
| AUC <sub>0-168</sub><br>(hr·ng/mg/mg/kg) | 1.03                                      | 1.96                                     | 6.28                                     |
| C <sub>max</sub> (ng/mg)                 | 0.133                                     | 0.178                                    | 0.504                                    |
| T <sub>max</sub> (hr)                    | 2                                         | 2                                        | 2                                        |
| Eff T <sub>1/2</sub> (hr)                | 10.7                                      | 10.5                                     | 11.1                                     |

AUC<sub>0-168</sub>, area under the concentration-time curve from 0 to 168 hours; C<sub>max</sub>, maximum

observed concentration; PK, pharmacokinetic; IV, intravenous; mRNA, messenger RNA; Eff

T<sub>1/2</sub>, Effective terminal half-life; T<sub>max</sub>, time to maximum observed concentration.

**Supplementary Table 7.** Summary statistics for PD Parameters of liver hPAH protein and blood phenylalanine in from mRNA-3210 treated PAH<sup>enu2</sup> mice.

|                                          | <b>mRNA-3210<br/>(0.25 mg/kg)<br/>n=8</b> | <b>mRNA-3210<br/>(0.5 mg/kg)<br/>n=8</b> | <b>mRNA-3210<br/>(1.0 mg/kg)<br/>n=8</b> |
|------------------------------------------|-------------------------------------------|------------------------------------------|------------------------------------------|
| <b>hPAH Protein<sup>a</sup></b>          |                                           |                                          |                                          |
| TE <sub>max</sub> (hr)                   | 24                                        | 24                                       | 8                                        |
| E <sub>max</sub> (ng/g)                  | 6950                                      | 16,700                                   | 35,600                                   |
| TE <sub>last</sub> (h), median           | 96                                        | 168                                      | 168                                      |
| AUC <sub>0-168</sub> (h·ng/g), mean      | 498,000                                   | 1,130,000                                | 2,090,000                                |
| <b>Phenylalanine</b>                     |                                           |                                          |                                          |
| TE <sub>max</sub> (h), median (min-max)  | 12 (1-24)                                 | 24 (24-24)                               | 48 (12-48)                               |
| E <sub>max</sub> (μmol/L), mean ± SD     | 1105 ± 209                                | 561 ± 279                                | 138 ± 78                                 |
| TE <sub>last</sub> (h), median (min-max) | 168 (168-168)                             | 168 (168-168)                            | 168 (168-168)                            |
| AUC <sub>below_B</sub> , mean ± SD       | 21,502 ± 15,533                           | 64,960 ± 25,013                          | 150,044 ± 52,699                         |

AUC<sub>0-168</sub>, area under the concentration-time curve from 0 to 168 hours; AUC<sub>below\_B</sub>; area under the curve that is below the baseline and above the response curve; C<sub>max</sub>, maximum observed concentration; E<sub>max</sub>, maximum effect; hPAH, human phenylalanine hydroxylase; mRNA, messenger ribonucleic acid; PD, pharmacodynamics; PK, pharmacokinetic; TE<sub>last</sub>, time to last measurable effect; TE<sub>max</sub>, time to maximum effect; T<sub>last</sub>, time to last measurable concentration.

<sup>a</sup>PD parameters generated using sparse samples.



**Supplementary Table 8. List of studies and analytes used for development of PK/PD the mRNA-3927 model.**

| Study            | Test article                  | IV dose (mg/kg)        | Dosing frequency | Species | Strain                             | Analytes                      |
|------------------|-------------------------------|------------------------|------------------|---------|------------------------------------|-------------------------------|
| 2308-060         | mRNA-3927                     | 1.0 and 2.0            | Single dose      | Mouse   | <i>Pcca</i> <sup>-/-</sup> (A138T) | Plasma hPCCA and hPCCB mRNA   |
| 01070005         | mRNA-3927                     | 1.0, 3.0, and 9.0      | Q2W × 3          | Rat     | Sprague-Dawley                     | Plasma hPCCA and hPCCB mRNA   |
| 5002694          | mRNA-3927                     | 1.0, 3.0, and 5.0      | Q2W × 3          | Monkey  | Cynomolgus                         | Plasma hPCCA and hPCCB mRNA   |
| 2357, 2514, 2524 | hPCCA/hPCCB mRNA <sup>a</sup> | 1.0                    | Single dose      | Mouse   | <i>Pcca</i> <sup>-/-</sup> (A138T) | Liver hPCCA and hPCCB protein |
| 3037             | mRNA-3927                     | 0.2, 0.5, 1.0, and 2.0 | Single dose      | Mouse   | <i>Pcca</i> <sup>-/-</sup> (A138T) | Plasma 2-MC, 3-HP, and C3/C2  |
| 3082             | mRNA-3927                     | 0.5 and 2.0            | Q3W × 4          | Mouse   | <i>Pcca</i> <sup>-/-</sup> (A138T) | Plasma 2-MC, 3-HP, and C3/C2  |

2-MC, 2-methylcitrate; 3-HP, 3-hydroxypropionate; C3/C2, ratio of propionylcarnitine to acetylcarnitine; hPCCA, human propionyl-CoA carboxylase  $\alpha$  subunit; hPCCB, human propionyl-CoA carboxylase  $\beta$  subunit; IV, intravenous; mRNA, messenger RNA; PD, pharmacodynamic; PK, pharmacokinetic; Q2W, every 2 weeks; Q3W, every 3 weeks.

<sup>a</sup>PCCA and PCCB mRNA co-dosed in a 1:1 ratio.

**Supplementary Table 9. List of studies and analytes used for development of PK/PD the mRNA-3705 model.**

| Study    | Test article          | IV dose (mg/kg)   | Dosing frequency                                                            | Species | Strain                                                 | Analytes                               |
|----------|-----------------------|-------------------|-----------------------------------------------------------------------------|---------|--------------------------------------------------------|----------------------------------------|
| 20238405 | mRNA-3705             | 0.1, 0.5, and 1.0 | Single dose                                                                 | Mouse   | CD1                                                    | Plasma hMUT mRNA<br>Liver hMUT protein |
|          | CX-020629 in SM86/DMG | 1.0               |                                                                             |         |                                                        |                                        |
| 20238406 | mRNA-3705             | 0.1, 0.5, and 1.0 | Single dose                                                                 | Rat     | Sprague-Dawley                                         | Plasma hMUT mRNA                       |
| 2023408  | mRNA-3705             | 0.2 and 1.0       | Single dose                                                                 | Monkey  | Cynomolgus                                             | Plasma hMUT mRNA                       |
| 3767     | mRNA-3705             | 0.2 and 0.5       | QM × 2                                                                      | Mouse   | <i>Mut</i> <sup>-/-</sup> ;TgINS-CBA-G715V hypomorphic | Plasma methylmalonic acid              |
|          | CX-020629 in SM86/DMG | 0.5               |                                                                             |         |                                                        |                                        |
| 3893     | mRNA-3705             | 0.2, 0.5, and 1.0 | 6 doses administered on Day 0, Week 4, Week 6, Week 8, Week 10, and Week 12 | Mouse   | <i>Mut</i> <sup>-/-</sup> ;TgINS-CBA-G715V hypomorphic | Plasma methylmalonic acid              |
|          | CX-020629 in SM86/DMG | 0.5               |                                                                             |         |                                                        |                                        |
| 3495     | mRNA-3705             | 0.2 and 0.5       | Single dose                                                                 | Mouse   | <i>Mut</i> <sup>-/-</sup> ;TgINS-CBA-G715V hypomorphic | Plasma methylmalonic acid              |
|          | CX-020629 in SM86/DMG | 0.5               |                                                                             |         |                                                        |                                        |

DMG, dimyristoyl glycerol; hMUT, human methylmalonyl-CoA mutase; IV, intravenous; LNP, lipid nanoparticle; mRNA, messenger RNA; PD, pharmacodynamic; PK, pharmacokinetic; QM, monthly.

Note: mRNA-3705 consists of CX-020629 mRNA formulated in SM-86/OL56 LNP; CX-020629 in SM-86/DMG consists of CX-020629 formulated in SM-86/DMG LNP.

**Supplementary Table 10. List of studies and analytes used for development of PK/PD the mRNA-3210 model.**

| Study    | Test article | IV dose (mg/kg)    | Dosing frequency | Species | Strain                                                       | Analytes                                                     |
|----------|--------------|--------------------|------------------|---------|--------------------------------------------------------------|--------------------------------------------------------------|
| 5003937  | mRNA-3210    | 0.25, 0.5, and 1.0 | Single dose      | Mouse   | B6.BTRB- <i>Pah<sup>enu2</sup></i>                           | Blood Phe<br>Serum and liver hPAH mRNA<br>Liver hPAH protein |
| 5003975  | mRNA-3210    | 0.5                | Single dose      | Mouse   | C57BL/6<br>B6.BTRB- <i>PAH<sup>enu2+/+</sup></i> (wild-type) | Serum and liver hPAH mRNA<br>Liver hPAH protein              |
| 5003976  | mRNA-3210    | 0.25, 0.5, and 1.0 | QW × 3           | Mouse   | B6.BTRB- <i>PAH<sup>enu2</sup></i>                           | Blood Phe<br>Liver hPAH protein                              |
| 20358989 | mRNA-3210    | 0.5                | Single dose      | Monkey  | Cynomolgus                                                   | Serum hPAH mRNA<br>Liver hPAH protein                        |
| 20358990 | mRNA-3210    | 1.0, 3.0, and 6.0  | QW × 3           | Monkey  | Cynomolgus                                                   | Serum hPAH mRNA                                              |

enu2, N-ethyl-N-nitrosourea, hPAH, human phenylalanine hydroxylase; mRNA, messenger RNA; PAH, phenylalanine hydroxylase; PD, pharmacodynamic; Phe, phenylalanine; PK, pharmacokinetic; QW, weekly.
